# 1 **Diversity and disease: evidence for the monoculture effect beyond**

## 2 **agricultural systems**

3

### 4 **Authors**

5 Alice K.E. Ekroth<sup>1\*</sup>, Charlotte Rafaluk-Mohr<sup>1</sup>, Kayla C. King<sup>1</sup>

6 <sup>1</sup> Department of Zoology, University of Oxford, Oxford, OX1 3PS, UK.

7 \* Corresponding Author: [alice.ekroth@zoo.ox.ac.uk](mailto:alice.ekroth@zoo.ox.ac.uk)

8

### 9 **Authorship**

10 A.K.E.E. and K.C.K conceived and designed the study. A.K.E.E. gathered the data and  
11 performed the statistical analysis with C.R-M. A.K.E.E. and K.C.K. wrote the paper.

12

13 **Key words:** Monoculture effect, genetic diversity, host-parasite interactions, specialisation,  
14 virulence, meta-analysis

15

### 16 **Acknowledgments**

17 We are grateful to PB Pearman, AR Wargo, P Schmid-Hempel, NK Whiteman, TD Seeley, DR  
18 Tarpy, F Altermatt, S van Houte & E Westra for sharing their raw data with us. We also thank  
19 CM Lively for comments on our manuscript. A.K.E.E. acknowledges funding from Natural  
20 Environment Research Council (NE/L002612/1). Funding was also provided by the  
21 Leverhulme Trust and European Research Council to C.R-M. and K.C.K.

22

23 The authors have no competing interests.

24

25 **Abstract**

26

27 Human activities are greatly reducing the genetic diversity of species worldwide. Given the  
28 prediction that parasites better exploit less diverse host populations, many species could be  
29 vulnerable to disease outbreaks. However, the widespread nature of the ‘monoculture  
30 effect’ remains unclear outside agricultural systems. We conducted a meta-analysis of 22  
31 studies, obtaining a total of 66 effect sizes, to directly test the biological conditions under  
32 which host genetic diversity limits infectious disease in populations. Overall, we found broad  
33 support for the monoculture effect across host and parasite species. The effect was  
34 independent of host range, host reproduction, parasite diversity, and the method by which  
35 the monoculture effect was recorded. Conversely, we found that parasite functional group,  
36 virulence, and empirical environment matters. Together, these results highlight the general  
37 susceptibility of genetically homogenous populations to infection. Consequently, this  
38 phenomenon could become increasingly common and alarming for at-risk populations due  
39 to human-driven declines in genetic diversity and shifts in parasite distributions.

40

41

42

43

44

45

46

47

48

## 49 **Introduction**

50

51 Most natural populations are genetically diverse (1). In host populations, genetic diversity is  
52 thought to increase the chance that one or more individuals in a population is resistant to  
53 infection, and thereby reduces the likelihood of a parasite encountering a susceptible host  
54 (2). Genetically homogenous host populations are conversely believed to be more  
55 vulnerable to infection given the uniformity of host susceptibility. This relationship between  
56 low genetic diversity and high disease incidence is referred to as the 'monoculture effect'  
57 (3).

58

59 The study of the monoculture effect in agricultural settings is extensive (4–6). A recent  
60 meta-analysis showed that with increased diversity in intraspecific cultivar mixtures disease  
61 presence is reduced and crop yields increased (6). However, we know little of the extent to  
62 which the monoculture effect can occur across species and environments in natural systems  
63 and beyond agricultural contexts. Crop plants are under artificial selection for high yield,  
64 and may therefore exhibit less genetic polymorphism than those in the wild.

65

66 Threats to genetic diversity are on the rise. Habitat alterations, pollution, and global  
67 temperature changes, as well as the restriction of species geographical ranges may lead to  
68 higher chances of genetic drift and reduced population genetic diversity (7). Consequently,  
69 populations might suffer diminished evolutionary potential (8) and increased inbreeding  
70 depression (9,10). Knowing whether there is an additional, and perhaps more immediate  
71 and intense, threat of outbreaks in these populations is crucial for disease management and  
72 species conservation approaches.

73

74 Theory has illuminated the dynamics of parasite spread (3,11–14) in diverse host  
75 populations as well as examined the level of diversity required to stop transmission (15,16).  
76 However, the generality of the monoculture effect in nature remains unclear for several  
77 reasons. Firstly, given the infection rates of some parasites can be determined by host  
78 density (2), the relative effects of density versus host genetic diversity need to be elucidated  
79 (16). Shrinking habitats, for example, can result in higher population densities (and lower  
80 resource availability) where parasites can transmit better due to more contact between  
81 hosts (17,18). Secondly, even when focusing on host genetic diversity alone, there is great  
82 variation across systems in the conditions under which infection and diversity are measured.  
83 In genetically homogenous bumble bee (*Bombus terrestris* L.) populations, *Nosema bombi*  
84 has higher success, but not *Crithidia bombi*, compared to diverse populations (19). In other  
85 cases, we see an increase in disease impact in homogenous host populations when infection  
86 is by multiple parasite species (19–22) but not always with specific interactions between  
87 one host-parasite species pair (23,24). Thirdly, because parasite infection is measured  
88 differently across studies, and even within systems, there is the potential that the relevant  
89 measure of parasite success isn't used. For example, in honeybee (*Apis mellifera*) host  
90 populations, genetic diversity has a negative impact on parasite success when infection  
91 prevalence or parasite load is measured, but not always when host survival is calculated  
92 (25). Host survival might be less informative, particularly for parasites that are not obligate  
93 killers: not all hosts that are infected might die, but also host mortality can impede parasite  
94 transmission if the parasite requires host-to-host contact for infection to spread. It is  
95 therefore unclear whether the monoculture effect is relevant to host-parasite interactions  
96 across the tree of life.

97

98 We tested the generality of the monoculture effect with a formal meta-analysis across a  
99 range of host-parasite systems. We searched the published literature for all publicly  
100 available data sources and compared the effects of low and high host genetic diversity on  
101 parasite success using a nested random mixed effects meta-analysis model and Pearson's  
102 correlation coefficient effect size  $r$  (with positive values indicating monoculture effects). We  
103 define 'parasite success' as a parasite's ability to have a high abundance in the host  
104 population whether it is measured as infection load/host, prevalence, or host mortality. We  
105 also tested whether empirical contexts or biological factors associated with the species in  
106 the interaction could explain variation in the effect of diversity on parasite success.

107

## 108 **Materials and methods**

109

### 110 *Literature search*

111

112 Using Web of Knowledge, Google Scholar and PubMed, we searched the literature using  
113 various combinations of the following keywords: 'host genetic diversity', 'low versus/and  
114 high host genetic diversity', 'heterogeneous versus/and homogenous host populations',  
115 'monoculture effect', 'disease spread', and 'parasite prevalence' to investigate the effect of  
116 low versus high host population diversity on parasite disease impact (see Supp. Fig. 1 for  
117 PRISMA flowchart (26) summarising study collection process). We gathered data where  
118 measurements were taken of parasite success in host populations of varying genetic  
119 diversity. These measurements included; parasite load, parasite virulence, parasite  
120 abundance, host mortality rate, viral concentrations, viral load, infection rate, and infection

121 intensity. We also checked reference lists along with paper citations for other potential  
122 papers. Studies were also searched for and extracted from review papers.

123

124 Papers were included in this study if they met the following inclusion criteria:

125

126 i. The study was published in a peer reviewed academic journal.

127

128 ii. The study collected parasite success data from two distinct comparable host  
129 population groups with any measured difference in diversity, such as low versus  
130 high diversity, inbred versus outbred, and monoculture versus polyculture.

131

132 iii. In the study, both host population groups contained the same species.

133

134 iv. The study measured genetic diversity at the host population level and not  
135 community diversity or individual-level genetic heterozygosity.

136

137 v. The study was not conducted in an agricultural system.

138

139 vi. The study did not interfere with parasite or host lifecycle, as in passaging  
140 manipulations.

141

142

143 We decided to exclude agricultural studies as a meta-analysis has already demonstrated the  
144 benefits of intraspecific diversity to crop yields (and thus host fitness) in the presence of  
145 infectious disease (6).

146

#### 147 *Statistical analysis*

148

149 We calculated Pearson's correlation coefficient,  $r$ , from studies using the method described  
150 in Field & Gillet (2010). This measure was chosen as it allowed for a direct comparison  
151 between two continuous variables, which in our case is low vs high host population  
152 diversity. To calculate effect size  $r$ , mean parasite infection measurements and their  
153 standard deviation for each treatment were extracted in the order of low host population  
154 diversity and high host population diversity. We extracted data from either paper figures,  
155 reported statistics in the text, or raw data received from authors. Where means and  
156 standard deviations in each group were not available (2 out of 22 studies), t-values and  
157 degrees of freedom were extracted.

158

159 We performed a nested random mixed effects meta-analysis model using the *rma.mv*  
160 function in the package *metafor* in R version 3.6.0 (R core development team). We chose  
161 this model to account for the fact that we collected several effect sizes per study, where  
162 some studies shared the same host species, which has the potential for pseudo-replication  
163 and phylogenetic non-independence. We first tested for an overall relationship between  
164 host population genetic diversity and parasite success using the entire dataset. Next, we  
165 tested for context dependence in the magnitude of the monoculture effects by focusing on  
166 the moderator variables: empirical environment, parasite infection measure, host

167 reproduction, parasite functional group, host range, initial parasite diversity, and ability of  
168 parasite to cause host death. The measure of heterogeneity of moderator variables was  
169 reported as  $Q$ , where  $Q$  is the weighted sum of squares about the fixed effect estimate  
170 between subgroups (27).

171

172 We tested for an effect of empirical contexts or approach on the strength of the  
173 monoculture effect. In addition to dividing up studies into field or lab empirical  
174 environments, we also tested an effect of the parasite success measure on the strength of  
175 the monoculture effect. Thus, we separated measures into three groups; parasite  
176 prevalence, parasite load, and host mortality. Studies looking at overall parasite presence in  
177 a host population were placed under the category 'parasite prevalence'. Where measures of  
178 parasite propagules per host were taken, studies were placed under 'parasite load'.  
179 Measures of mortality within a population were placed under 'mortality'. Measures of host  
180 survival were transformed into host mortality by subtracting calculated survival data from  
181 the entire measured population.

182

183 We then focused on the impact of aspects of host and parasite biology that could explain  
184 variation in the effect of host diversity on parasite success. Specifically, we tested whether  
185 the strength of the monoculture effect was related to host reproductive mode, given sexual  
186 and asexual strategies generate disparate levels of genetic diversity; infection by micro- or  
187 macroparasites, as the former tends to be associated with higher pathogenicity (28); and  
188 finally, host range (specialists or generalists), as it is assumed host resistance is genetic-  
189 based and there is a long-standing association between host and parasite. Here, we define  
190 specialist as a parasite only able to infect one host species and generalist as a parasite able



191 to infect multiple host species. In addition, because higher levels of parasite diversity are  
192 thought to increase the pool of susceptible hosts in a diverse population, we separated  
193 studies into three categories – one genotype of one parasite species (1 Genotype), multiple  
194 parasite genotypes of one parasite species (>1 Genotypes), and many parasite species (>1  
195 Species) – to determine the importance of parasite diversity on the strength of the  
196 monoculture effect. Lastly, we tested whether the parasite’s ability to cause host death was  
197 associated with the strength of the monoculture effect. More virulent parasites could select  
198 for greater levels of resistance in the host population, whereas there may not be genetic  
199 variation for resistance in diverse host populations infected by less harmful parasites.

200

201 *Assessing for potential publication bias*

202

203 Studies that report larger effects are more likely to get published in comparison to studies  
204 reporting smaller effects (29). To check for publication bias, we visualised the spread of our  
205 effect sizes by creating a funnel plot (Supp. Fig. 2). We then performed a Fail-Safe N analysis  
206 to calculate the number of additional studies needed to reduce the significance level of the  
207 weighted average effect size (30).

208

## 209 **Results**

210

211 We found 22 papers containing data to answer the research question and followed the  
212 inclusion criteria. Papers often included results from multiple experiments or exposures to  
213 multiple parasite species. A total of 66 effect sizes were retrieved from this data set,  
214 covering a diverse range of host and parasite species (Table 1).

215

216 After the construction of a funnel plot, we find no indication of a publication bias in this

217 meta-analysis data set, with the majority of points falling within the plot (Supp. Fig. 1).

218 Rosenberg's Fail-safe N analysis showed that an additional 644 studies would need to be

219 added to reduce the significance level of this meta-analysis.

220

221 Our results are consistent with the monoculture effect hypothesis, showing that low host

222 genetic diversity increases parasite success ( $r = 0.3950$ ,  $z = 3.1349$ ,  $p < 0.0001$ , Fig. 1A). We

223 found that the strength of the direction of the effect size is influenced by empirical

224 environment ( $Q = 8.4778$ , d.f. = 1,  $p = 0.0036$ , Fig. 1B), where field studies ( $r = 0.2801$ ) did

225 significantly differ from lab studies ( $r = 0.1077$ ). However, parasite infection measures (i.e.

226 parasite load, parasite prevalence, or host mortality) do not significantly influence the effect

227 size ( $Q = 3.5302$ , d.f. = 2,  $p = 0.1712$ , Fig. 1C).

228

229 We examined the impact of a suite of host and parasite characteristics on the strength of

230 the monoculture effect. We found that host reproduction was not a factor that significantly

231 influenced the strength of the effect size ( $Q = 3.7744$ , d.f. = 2,  $p = 0.1515$ , Fig. 2A). A study

232 by Altermatt & Ebert (2008) followed parasite infection of *Daphnia* during both sexual and

233 asexual reproduction, and was thus placed as a separate variable. We then focused on

234 parasite characteristics, we found that parasite functional group significantly influenced the

235 strength of the direction of the effect size ( $Q = 8.7057$ , d.f. = 1,  $p = 0.0032$ , Fig. 2B). Where

236 macroparasites ( $r = -0.0091$ ) had mostly no or a slightly negative impact, but microparasites

237 ( $r = 0.2298$ ) showed a strong, positive impact. The direction of the effect size was found not

238 to be influenced by host range ( $Q = 0.2771$ , d.f. = 1,  $p = 0.5986$ , Fig. 2C). We also found that

239 parasite diversity was not a significant factor on the strength of the monoculture effect ( $Q =$   
240  $3.5302$ , d.f. = 2,  $p = 0.1712$ , Fig. 2D). Finally, we investigated whether the ability of a parasite  
241 to cause host mortality would influence the direction of the effect size. We found a  
242 significant effect on parasite success ( $Q = 3.8744$ , d.f. = 1,  $p = 0.0490$ , Fig. 2E), whereby  
243 studies using parasites that could kill hosts showed a stronger monoculture effect ( $r =$   
244  $0.2120$ ) than those with less virulent parasites ( $r = 0.0627$ ).

245

246

## 247 **Discussion**

248

249 Our meta-analysis shows that host population genetic diversity reduces parasite success  
250 across multiple systems, approaches, and environments. Indeed, the monoculture effect is  
251 revealed under the majority of the biological variables we tested in the host-parasite  
252 relationship, but that microparasites and parasites that kill are more likely to encounter  
253 differences in resistance in host populations varying in diversity. Our findings additionally  
254 highlight the potential damage that emerging infectious diseases may have on genetically  
255 homogenous host populations, given that the monoculture effect is not dependent on a  
256 parasite's host range.

257

258 The parasites included in our meta-analysis were highly variable in terms of their host range.  
259 However, we show that the monoculture effect is independent of a parasite's host range.  
260 Indeed, the monoculture effect is equally as prevalent in highly specialised interactions (31–  
261 33), in broad spectrum interactions at the genotypic level (34), and in those that cross host-  
262 species boundaries (21,22,35). That host range is not a factor here is in contrast to those

263 results found in crop studies. For example, in rusts and powdery mildews, disease severity is  
264 driven by pathogen specificity (5). The mirroring of parasite virulence genes to host  
265 resistance genes means that crop mixtures need to contain both susceptible and resistant  
266 cultivars to avoid a monoculture effect. When there is a lack of host specificity, mixed  
267 cultivar populations are just as susceptible as monocultures. For example, mixed cultivar  
268 populations have been observed to be slightly more susceptible to infection (36) or  
269 completely susceptible (37) in comparison to monocultures to the fungal pathogen  
270 *Mycosphaerella graminicola*. These findings suggest that the threat to crops from generalist  
271 parasites is greater than specialist parasites.

272

273 Given that host range did not influence the strength of the monoculture effect, it is possible  
274 that novel parasites, just as adapted parasites, could have high success in host  
275 monocultures. Essentially, homogenous populations could be vulnerable to outbreaks with  
276 spill-over or emerging infectious diseases which are less likely to be host specific (38), but  
277 for which there is clearly genetic variation for resistance. The resistance to emerging  
278 parasites in these cases could be due to historical contact or similar mechanisms of infection  
279 to parasites with an evolutionary history with the host (39). Nevertheless, this result is  
280 concerning from a conservation perspective as global climate change has the potential to  
281 reduce within-species genetic diversity (40) and alter host population ranges (41,42).  
282 Natural movement of individuals between populations has always served to bolster host  
283 diversity (42), and introducing new genotypes is an approach applied by conservation  
284 biologists to improve population viability (10). Whilst adding individuals to a population  
285 could increase diversity and reduce inbreeding (43), a risk may be that new individuals bring  
286 in new parasites to the population (44). Given that we found a stronger effect in field

287 studies, these consequences are of real concern. The potential being an increased overlap  
288 between host populations with low genetic diversity and novel infections.

289

290 The fact that we found a stronger monoculture effect in field studies highlights the  
291 importance of the maintenance of diversity in natural populations. As hosts are exposed to  
292 a greater variety of parasites in the field, there could be higher levels of resistance already  
293 present in diverse populations (39). Thus, when host diversity is artificially reduced (21),  
294 parasites normally unable to rapidly spread through a host population can now infect with  
295 minimal selection on virulence evolution. In addition, secluded host populations, such as  
296 island populations of Galapagos hawks (22), are naturally considered inbred compared to  
297 their main land or larger island counter parts and are therefore more vulnerable to  
298 infection. Also, island populations as well as social insects, such as bees (45), ants (46), and  
299 termites (47), live in tight proximities to each other making parasite transmission easier in  
300 homogenous populations. Indeed, despite being subjected to environmental noises, the  
301 monoculture effect is strong in the natural environment.

302

303 In our meta-analysis, macroparasites were not impeded by genetic heterogeneity in host  
304 populations. The macroparasites in the studies included herein are all ectoparasites, and  
305 their biology may explain why. Their transmission is often dependent on host-to-host  
306 contact (48,49) and thus host density is a critical factor in parasite success (48). Host density  
307 may play a more important role than host genetic diversity such that similarly aggregated  
308 populations of either genetically high or low host populations might be equally susceptible  
309 to infection. It has been shown that clustering of captive animal populations restricted by  
310 movement or wild animal populations restricted by ranges are highly vulnerable to

311 ectoparasites (44,50). Moreover, host social behaviours, such as grooming (25) or preening  
312 (22) can reduce ectoparasite success. In fact, in populations where social grooming is  
313 correlated with relatedness, ectoparasite load is dramatically reduced in highly related  
314 individuals (51). Taken together, host diversity on its own does not always explain a  
315 reduction in parasite success, particularly in the case of ectoparasites.

316

317 We reveal that the monoculture effect is more likely to be observed in systems with a  
318 parasite that can cause host mortality. This outcome may stem from greater selection for  
319 resistance in diverse host populations at risk of infection and death from parasites (52).

320 Whilst some parasites in the relevant studies are obligate killers, such as bacteriophages  
321 (33), some merely have the potential to cause host mortality. For example, *Crithidia bombi*  
322 can cause mortality in bumble bees (*Bombus* spp) when the colony is stressed by lack of  
323 access to food sources (53). It is nevertheless possible that host population genetic diversity,  
324 as measured in the studies with less virulent parasites, may not be correlated with diversity  
325 in resistance *per se*.

326

327 Understanding the impact of reduced genetic diversity on parasite infection outside of  
328 agricultural systems is crucial because of anthropogenic threats to the diversity of wild  
329 populations. This meta-analysis reveals that the monoculture effect is a widespread  
330 phenomenon across host and parasite species in nature, with microparasites and host-killing  
331 parasites being the most likely to encounter resistance in diverse host populations. Indeed,  
332 these broad patterns show that genetic diversity is a robust weapon against infection, but  
333 that further attacks on diversity could drive outbreaks of both coevolving and emerging  
334 infectious diseases. However, these results suggest that conservation efforts should focus

335 on preserving population genetic diversity in vulnerable populations to improve their ability  
336 to fight off deadly infections.

337

338

## 339 **References**

340

341 1. Haldane JBS. Suggestions as to Quantitative Measurement of Rates of Evolution.  
342 Evolution. 1949;3(1):51–6.

343 2. Anderson RM, May RM. Coevolution of hosts and parasites. Parasitology.  
344 1982;85(02):411.

345 3. Elton CS. The Ecology of Invasions by Animals and Plants. University of Chicago Press;  
346 1958. 226 p.

347 4. Smithson JB, Lenné JM. Varietal mixtures: a viable strategy for sustainable productivity  
348 in subsistence agriculture. Annals of Applied Biology. 1996;128(1):127–58.

349 5. Mundt CC. Use of Multiline Cultivars and Cultivar Mixtures for Disease Management.  
350 Annual Review of Phytopathology. 2002;40(1):381–410.

351 6. Reiss ER, Drinkwater LE. Cultivar mixtures: a meta-analysis of the effect of intraspecific  
352 diversity on crop yield. Ecological Applications. 2018;28(1):62–77.

353 7. Swaegers J, Mergeay J, Therry L, Larmuseau MHD, Bonte D, Stoks R. Rapid range  
354 expansion increases genetic differentiation while causing limited reduction in genetic  
355 diversity in a damselfly. Heredity. 2013;111(5):422–9.

356 8. Frankham R, Ballou JD, Ralls K, Eldridge M, Dudash MR, Fenster CB, et al. Genetic  
357 Management of Fragmented Animal and Plant Populations. Oxford University Press;  
358 2017. 426 p.

359 9. Spielman D, Brook BW, Briscoe DA, Frankham R. Does Inbreeding and Loss of Genetic  
360 Diversity Decrease Disease Resistance? Conservation Genetics. 2004;5(4):439–48.

361 10. Charlesworth D, Willis JH. The genetics of inbreeding depression. Nature Reviews  
362 Genetics. 2009;10(11):783–96.

363 11. Schmid-Hempel P. Parasites in Social Insects. Princeton University Press; 1998. 428 p.

364 12. Springbett AJ, MacKenzie K, Woolliams JA, Bishop SC. The Contribution of Genetic  
365 Diversity to the Spread of Infectious Diseases in Livestock Populations. Genetics.  
366 2003;165(3):1465–74.

- 367 13. Keesing F, Holt RD, Ostfeld RS. Effects of species diversity on disease risk. *Ecology*  
368 *Letters*. 2006;9(4):485–98.
- 369 14. Nath M, Woolliams JA, Bishop SC. Assessment of the dynamics of microparasite  
370 infections in genetically homogeneous and heterogeneous populations using a  
371 stochastic epidemic model1. *Journal of Animal Science*. 2008;86(8):1747–57.
- 372 15. Lively CM. The Effect of Host Genetic Diversity on Disease Spread. *The American*  
373 *Naturalist*. 2010;175(6):149–52.
- 374 16. King KC, Lively CM. Does genetic diversity limit disease spread in natural host  
375 populations? *Heredity*. 2012;109(4):199–203.
- 376 17. May RM. Conservation and Disease. *Conservation Biology*. 1988;2(1):28–30.
- 377 18. Loehle C. Social Barriers to Pathogen Transmission in Wild Animal Populations. *Ecology*.  
378 1995;76(2):326–35.
- 379 19. Baer B, Schmid-Hempel P. Experimental variation in polyandry affects parasite loads and  
380 fitness in a bumble-bee. *Nature*. 1999;397(6715):151–4.
- 381 20. Baer B, Schmid-Hempel P. Unexpected Consequences of Polyandry for Parasitism and  
382 Fitness in the Bumblebee, *Bombus terrestris*. *Evolution*. 2001;55(8):1639–43.
- 383 21. Baer B, Schmid-Hempel P. Bumblebee workers from different sire groups vary in  
384 susceptibility to parasite infection. *Ecology Letters*. 2003;6(2):106–10.
- 385 22. Whiteman NK, Matson KD, Bollmer JL, Parker PG. Disease ecology in the Galápagos  
386 Hawk (*Buteo galapagoensis*): host genetic diversity, parasite load and natural  
387 antibodies. *Proceedings of the Royal Society of London B: Biological Sciences*.  
388 2006;273(1588):797–804.
- 389 23. Reber A, Castella G, Christe P, Chapuisat M. Experimentally increased group diversity  
390 improves disease resistance in an ant species. *Ecology Letters*. 2008;11(7):682–9.
- 391 24. Schmidt AM, Linksvayer TA, Boomsma JJ, Pedersen JS. No benefit in diversity? The effect  
392 of genetic variation on survival and disease resistance in a polygynous social insect.  
393 *Ecological Entomology*. 2011;36(6):751–9.
- 394 25. Desai SD, Currie RW. Genetic diversity within honey bee colonies affects pathogen load  
395 and relative virus levels in honey bees, *Apis mellifera* L. *Behav Ecol Sociobiol*.  
396 2015;69(9):1527–41.
- 397 26. Moher D, Liberati A, Tetzlaff J, Altman DG. Preferred Reporting Items for Systematic  
398 Reviews and Meta-Analyses: The PRISMA Statement. *Annals of Internal Medicine*.  
399 2009;151(4):264.
- 400 27. Schwarzer G, Carpenter JR, Rücker G. Fixed Effect and Random Effects Meta-Analysis. In:  
401 Schwarzer G, Carpenter JR, Rücker G, editors. *Meta-Analysis with R*. Cham: Springer



- 402 International Publishing; 2015. p. 21–53. Available from: [https://doi.org/10.1007/978-](https://doi.org/10.1007/978-3-319-21416-0_2)  
403 3-319-21416-0\_2
- 404 28. Anderson RM, May RM. The invasion, persistence and spread of infectious diseases  
405 within animal and plant communities. 1986;38.
- 406 29. Borenstein M, Hedges LV, Higgins JPT, Rothstein HR. Introduction to Meta-Analysis. John  
407 Wiley & Sons; 2009. 434 p.
- 408 30. Rosenberg MS. The file-drawer problem revisited: A general weighted method for  
409 calculating fail-safe numbers in meta-analysis. *Evolution*. 2005;59(2):464.
- 410 31. Altermatt F, Ebert D. Genetic diversity of *Daphnia magna* populations enhances  
411 resistance to parasites. *Ecology Letters*. 2008;11(9):918–28.
- 412 32. Wargo AR, Kell AM, Scott RJ, Thorgaard GH, Kurath G. Analysis of host genetic diversity  
413 and viral entry as sources of between-host variation in viral load. *Virus Research*.  
414 2012;165(1):71–80.
- 415 33. van Houte S van, Ekroth AKE, Broniewski JM, Chabas H, Ashby B, Bondy-Denomy J, et al.  
416 The diversity-generating benefits of a prokaryotic adaptive immune system. *Nature*.  
417 2016;532(7599):385–8.
- 418 34. Pearman PB, Garner TWJ. Susceptibility of Italian agile frog populations to an emerging  
419 strain of Ranavirus parallels population genetic diversity. *Ecology Letters*.  
420 2005;8(4):401–8.
- 421 35. Hale KA, Briskie JV. Decreased immunocompetence in a severely bottlenecked  
422 population of an endemic New Zealand bird. *Animal Conservation*. 2006;10(1):2–10.
- 423 36. Gigot C, Saint-Jean S, Huber L, Maumené C, Leconte M, Kerhornou B, et al. Protective  
424 effects of a wheat cultivar mixture against splash-dispersed septoria tritici blotch  
425 epidemics. *Plant Pathology*. 2013;62(5):1011–9.
- 426 37. Cowger C, Mundt CC. Effects of Wheat Cultivar Mixtures on Epidemic Progression of  
427 Septoria Tritici Blotch and Pathogenicity of *Mycosphaerella graminicola*.  
428 *Phytopathology*. 2002;92(6):617–23.
- 429 38. Brooks DR, Hoberg EP. How will global climate change affect parasite–host  
430 assemblages? *Trends in Parasitology*. 2007;23(12):571–4.
- 431 39. Altizer S, Harvell D, Friedle E. Rapid evolutionary dynamics and disease threats to  
432 biodiversity. *Trends in Ecology & Evolution*. 2003;18(11):589–96.
- 433 40. Hoffmann AA, Sgrò CM. Climate change and evolutionary adaptation. *Nature*.  
434 2011;470(7335):479–85.
- 435 41. Bálint M, Domisch S, Engelhardt CHM, Haase P, Lehrian S, Sauer J, et al. Cryptic  
436 biodiversity loss linked to global climate change. *Nature Climate Change*.  
437 2011;1(6):313–8.

- 438 42. Pauls SU, Nowak C, Bálint M, Pfenninger M. The impact of global climate change on  
439 genetic diversity within populations and species. *Molecular Ecology*. 2013;22(4):925–  
440 46.
- 441 43. Frankham R. Conservation Genetics. *Annual Review of Genetics*. 1995;29(1):305–27.
- 442 44. Altizer S, Bartel R, Han BA. Animal Migration and Infectious Disease Risk. *Science*.  
443 2011;331(6015):296–302.
- 444 45. Tarpy DR, Seeley TD. Lower disease infections in honeybee *Apis mellifera* colonies  
445 headed by polyandrous vs monandrous queens. *Naturwissenschaften*. 2006;93(4):195–  
446 9.
- 447 46. Hughes WOH, Boomsma JJ. Genetic diversity and disease resistance in leaf-cutting ant  
448 societies. *Evolution*. 2004;58(6):1251–60.
- 449 47. Calleri DV, Reid EM, Rosengaus RB, Vargo EL, Traniello JFA. Inbreeding and disease  
450 resistance in a social insect: effects of heterozygosity on immunocompetence in the  
451 termite *Zootermopsis angusticollis*. *Proceedings of the Royal Society of London B:*  
452 *Biological Sciences*. 2006;273(1601):2633–40.
- 453 48. Viney M, Cable J. Macroparasite Life Histories. *Current Biology*. 2011;21(18):767–74.
- 454 49. Whiteman NK, Parker PG. Effects of Host Sociality on Ectoparasite Population Biology.  
455 *The Journal of Parasitology*. 2004;90(5):939–47.
- 456 50. Scott ME. The Impact of Infection and Disease on Animal Populations: Implications for  
457 Conservation Biology. *Conservation Biology*. 1988;2(1):40–56.
- 458 51. Frumhoff PC, Schneider S. The social consequences of honey bee polyandry: the effects  
459 of kinship on worker interactions within colonies. *Animal Behaviour*. 1987;35(1):255–  
460 62.
- 461 52. Gómez P, Buckling A. Bacteria-Phage Antagonistic Coevolution in Soil. *Science*.  
462 2011;332(6025):106–9.
- 463 53. Schmid-Hempel P. On the evolutionary ecology of host-parasite interactions: addressing  
464 the question with regard to bumblebees and their parasites. *Naturwissenschaften*.  
465 2001;88(4):147–58.
- 466
- 467
- 468
- 469

470 **Table 1:** Summary of literature on the effect of host population genetic diversity on  
471 measures of parasite success across host-parasite systems.

472

473 **Figure 1:** Impact of study approach on the effect of host genetic diversity on parasite  
474 success. Positive values indicate a monoculture effect is present (i.e., a negative association  
475 between genetic diversity and parasite success). Negative values represent the opposite  
476 relationship. At an effect size of zero (dashed line), there is no relationship between host  
477 genetic diversity and parasite success. (A) Overall effect size (n = 66). (B) Moderator analysis  
478 of study type between field (n = 36) and lab (n = 30) studies. (C) Moderator analysis of  
479 parasite infection measures between parasite load (n = 19), parasite prevalence (n = 34),  
480 and host mortality (n = 13). The size of the dot corresponds to the sample size. Effect sizes  
481 are shown with 95% confidence intervals.

482

483 **Figure 2:** Impact of host and parasite characteristics on the effect of host genetic diversity  
484 on parasite success. Positive values indicate a monoculture effect (i.e., a negative  
485 association between genetic diversity and parasite success). Negative values represent the  
486 opposite relationship. The dashed line (effect size of zero) represents no relationship  
487 between host genetic diversity and disease spread. Moderator analysis of (A) host  
488 reproduction mode: asexual (n = 5), both (n = 2), and sexual (n = 59) effect sizes, (B) of  
489 parasite functional group between microparasite (n = 56) and macroparasite (n = 10) effect  
490 sizes, (C) host range between specific (n = 15) and general (n = 51) parasite effect sizes, (D)  
491 initial parasite diversity between >1 genotype (n = 14), 1 genotype (n = 15), and >1 species (n  
492 = 37) effect sizes, and (E) of the ability of a parasite to cause host death, displayed as yes (n

493 = 56) and no ( $n = 10$ ) effect sizes. The size of the dot corresponds to the sample size. Effect

494 sizes are shown with 95% confidence intervals.

495

**A**

All studies combined

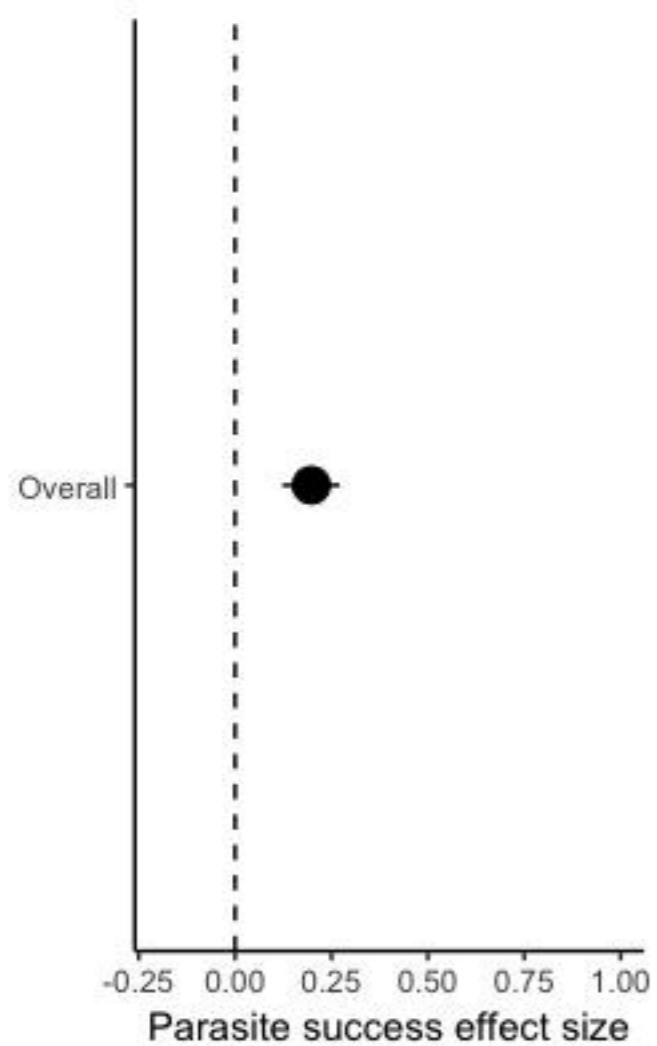**B**

Study type

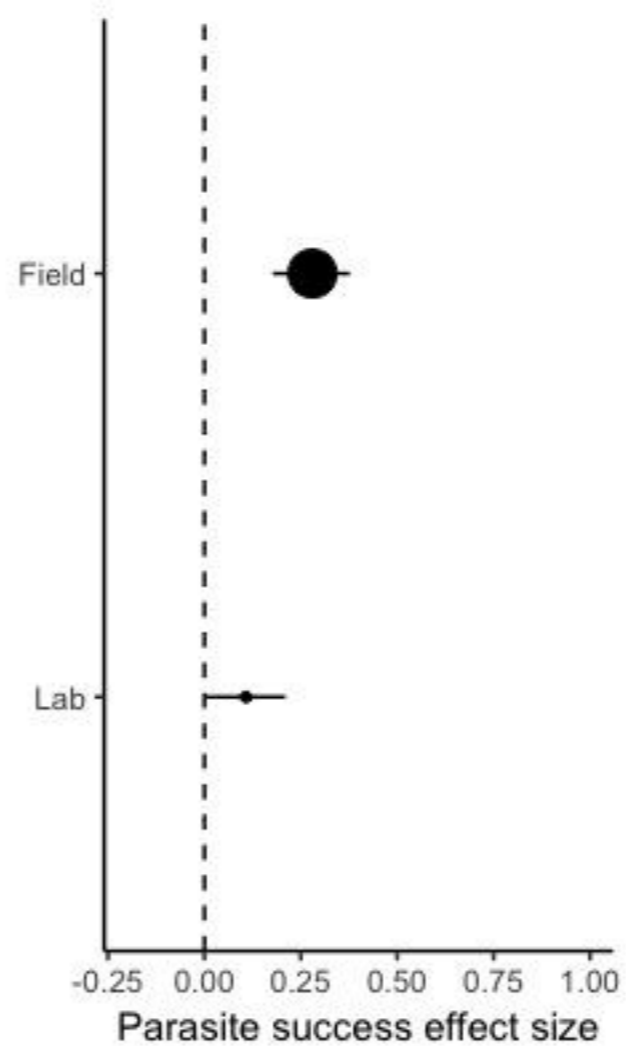**C**

Parasite infection measures

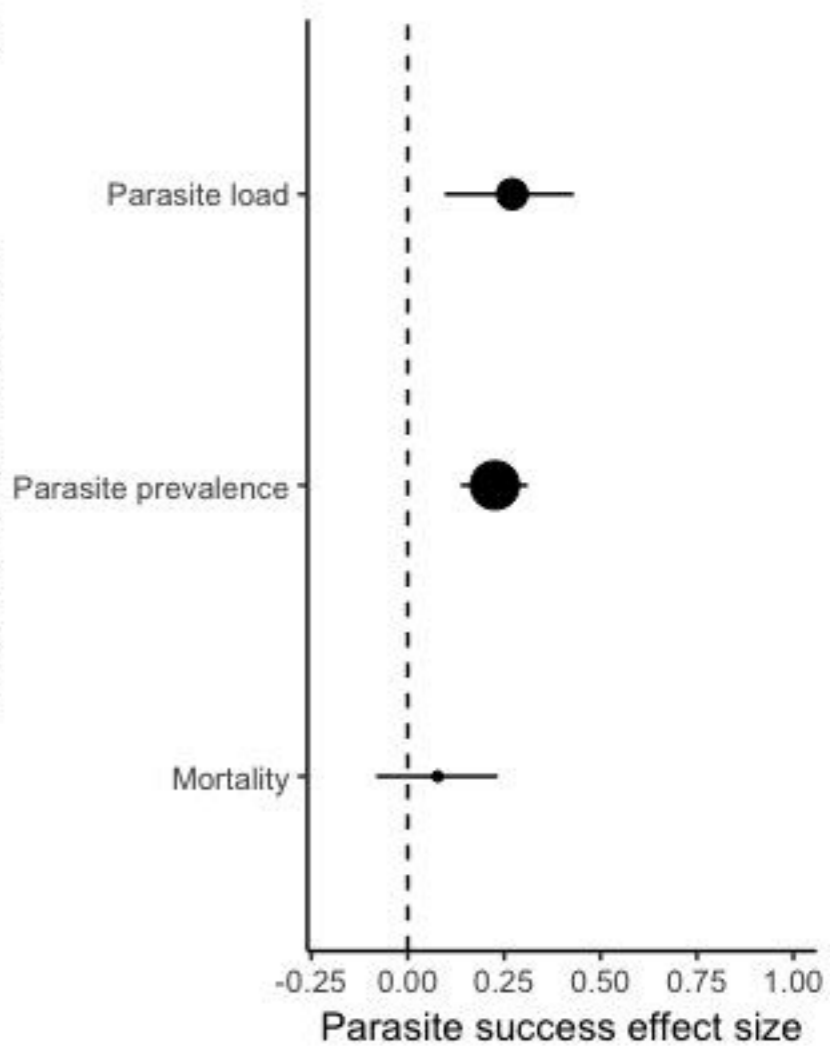

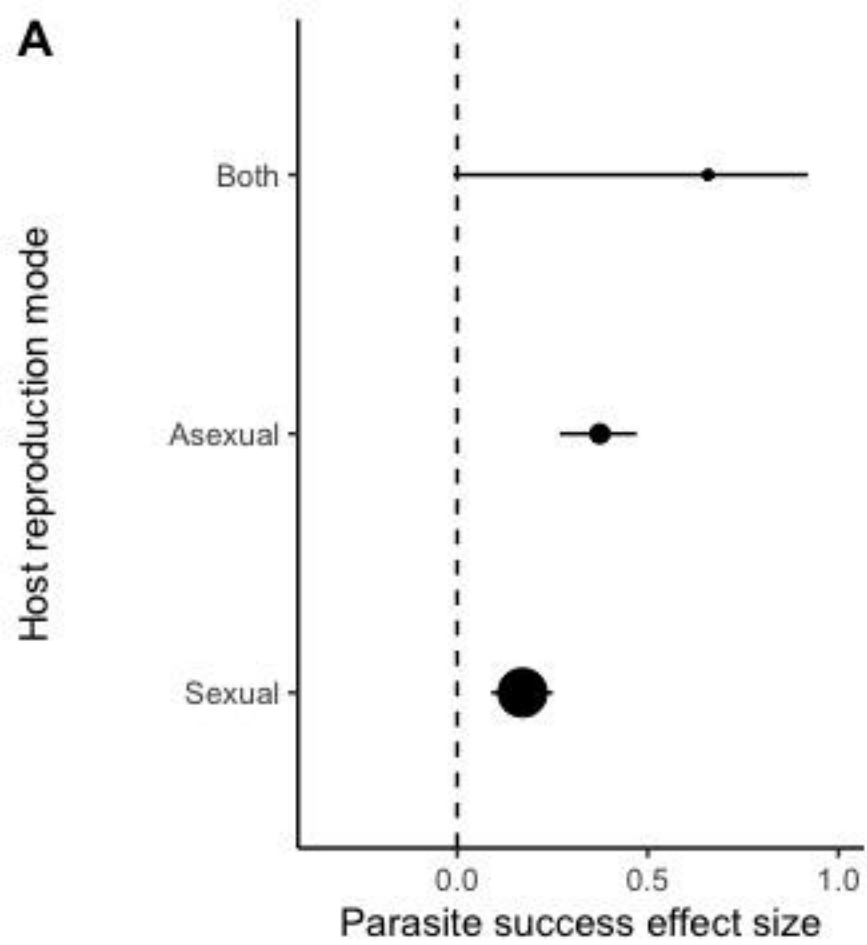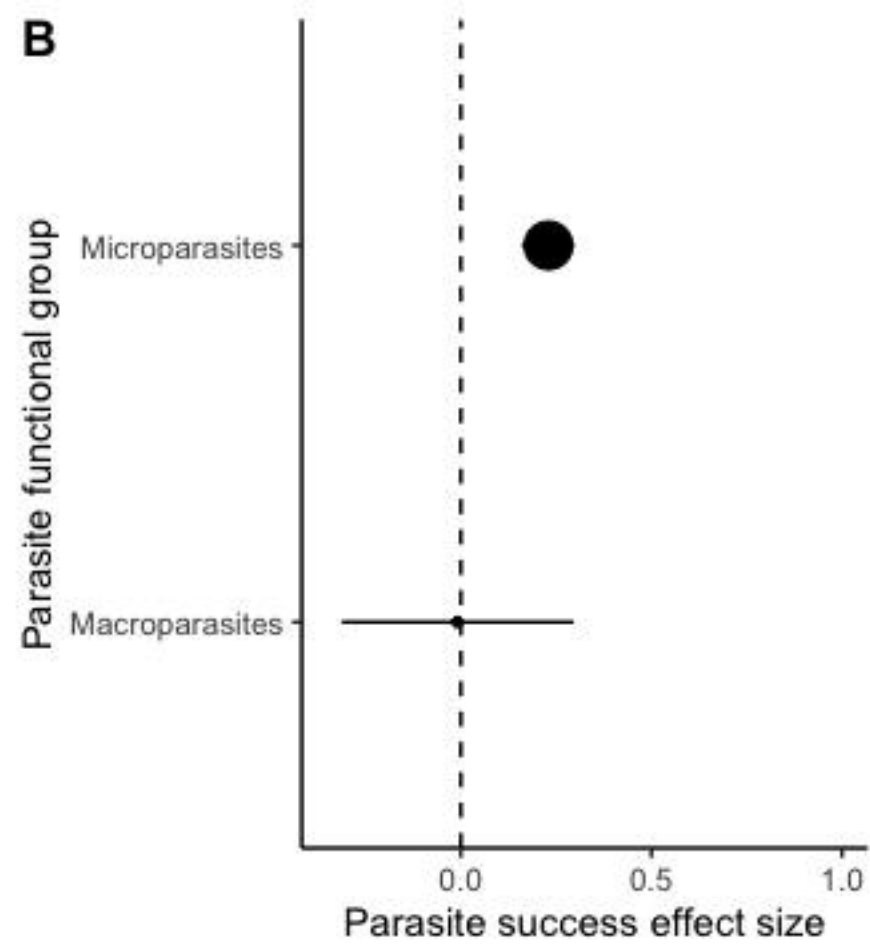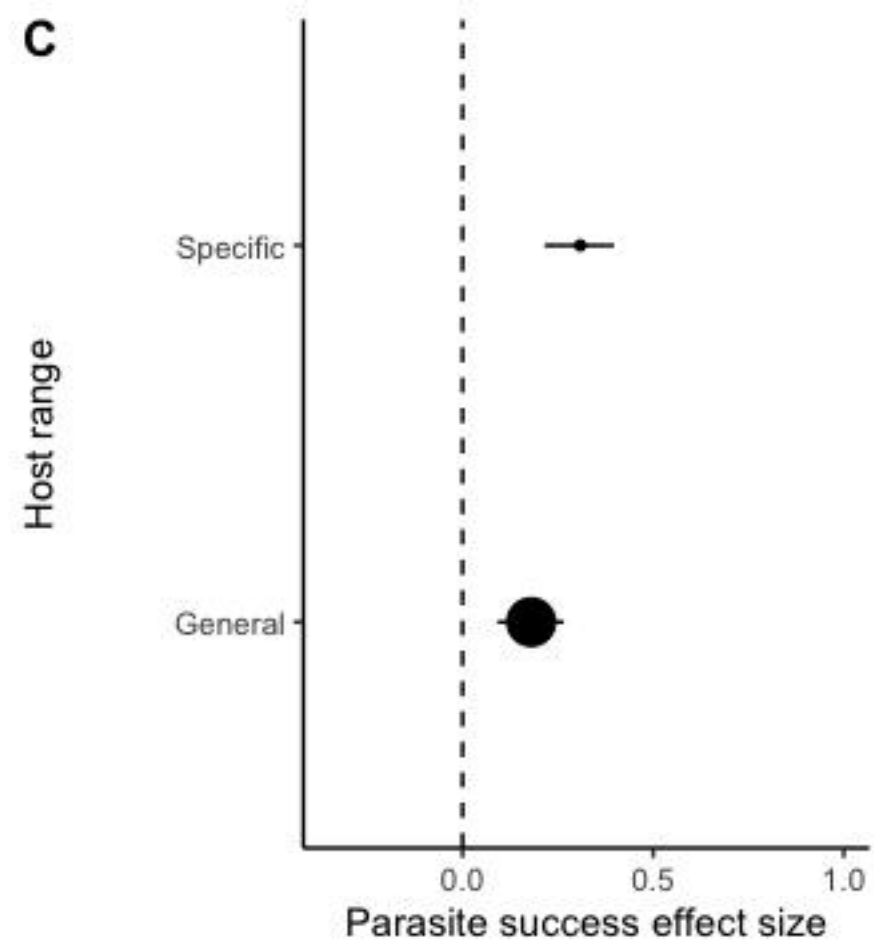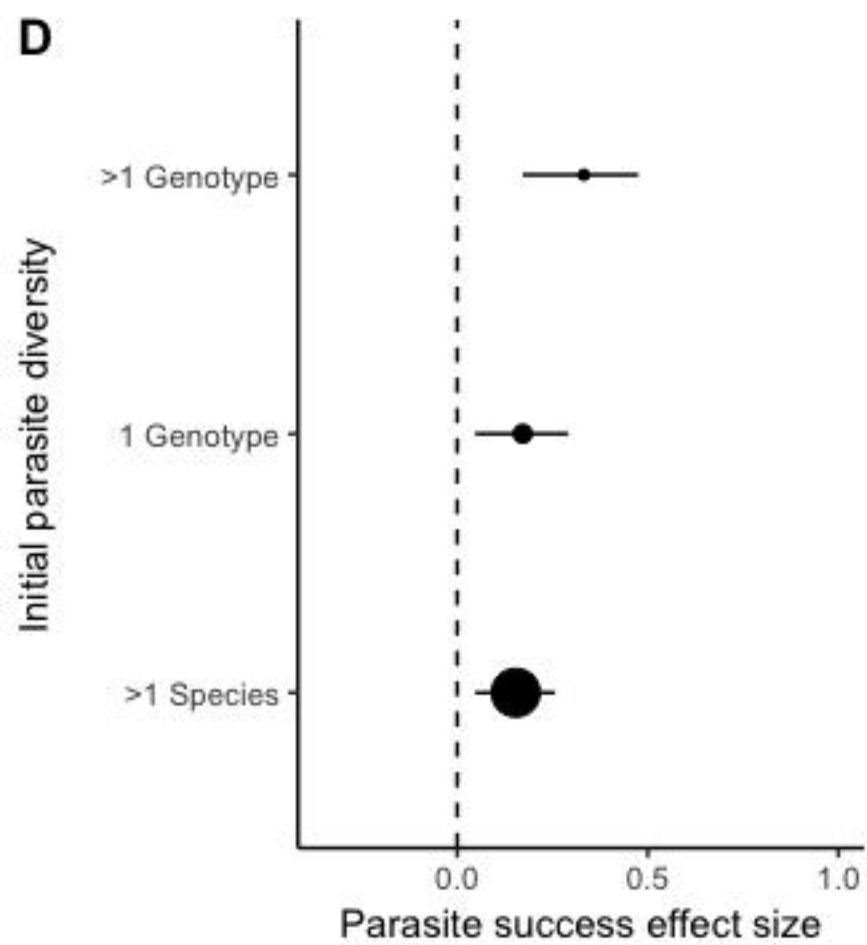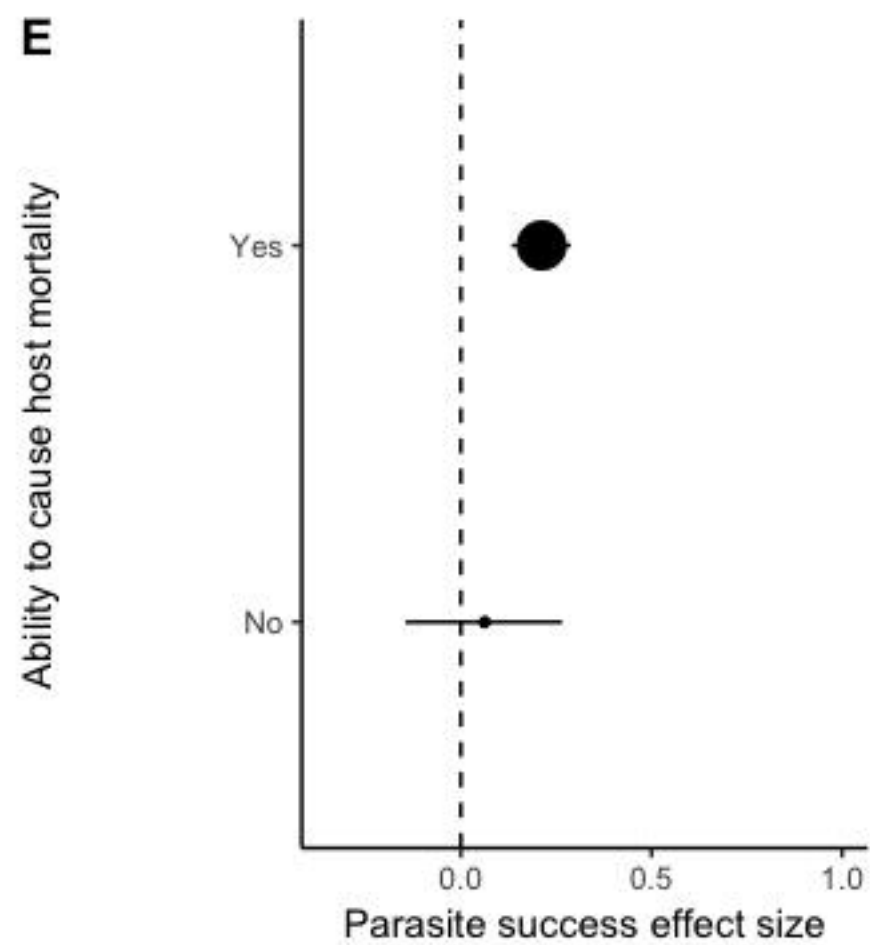

Table 1: Summary of literature on the effect of host population genetic diversity on measures of parasite success across host-parasite systems.

| Source paper                  | Paper number | Host                                   | Parasite                                        | Parasite type       | Infection measure | Data source        | Data extracted | n Effect sizes |
|-------------------------------|--------------|----------------------------------------|-------------------------------------------------|---------------------|-------------------|--------------------|----------------|----------------|
| Altermatt and Ebert (2008)    | 1            | <i>Daphnia magna</i>                   | <i>Octosporea bayeri</i>                        | Fungus              | Parasite load     | Figure 2, Raw data | Mean $\pm$ SD  | 2              |
| Baer and Schmid-Hempel (1999) | 2            | Bumblebee ( <i>Bombus terrestris</i> ) | <i>Crithidia bombi</i> ,<br><i>Nosema bombi</i> | Protozoa,<br>Fungus | Parasite load     | Figure 1, Raw data | Mean $\pm$ SE  | 4              |
| Baer and Schmid-              | 3            | Bumblebee ( <i>Bombus terrestris</i> ) | <i>Crithidia bombi</i>                          | Protozoa            | Parasite load,    | Figure 1, Raw data | Mean $\pm$ SD  | 4              |

|                                                   |   |                                                  |                                                       |                                    |                                                             |                               |           |    |
|---------------------------------------------------|---|--------------------------------------------------|-------------------------------------------------------|------------------------------------|-------------------------------------------------------------|-------------------------------|-----------|----|
| <b>Hempel<br/>(2001)</b>                          |   |                                                  |                                                       |                                    | Parasite<br>prevalence                                      |                               |           |    |
| <b>Baer and<br/>Schmid-<br/>Hempel<br/>(2003)</b> | 4 | Bumblebee ( <i>Bombus terrestris</i> )           | <i>Crithidia bombi</i>                                | Protozoa                           | Parasite load,<br>Parasite<br>prevalence                    | Raw data                      | Mean ± SD | 4  |
| <b>Calleri et al.<br/>(2006)</b>                  | 5 | Termite<br>( <i>Zootermopsis angusticollis</i> ) | <i>Metarhizium anisopliae</i>                         | Fungus                             | Parasite load                                               | In text                       | Mean ± SD | 1  |
| <b>Desai and<br/>Currie (2015)</b>                | 6 | Honeybee ( <i>Apis mellifera</i> L.)             | <i>Varroa destructor</i> ,<br>Deformed Wing<br>Virus, | Mite,<br>Virus,<br>Virus,<br>Virus | Parasite load,<br>Host mortality,<br>Parasite<br>prevalence | Figure 1,<br>2, 4, 5, 7,<br>8 | Mean ± SE | 11 |



|                                      |   |                                                  |                                                                                                                  |                              |                        |          |           |   |
|--------------------------------------|---|--------------------------------------------------|------------------------------------------------------------------------------------------------------------------|------------------------------|------------------------|----------|-----------|---|
|                                      |   |                                                  | Black Queen Cell<br>Virus,<br>Israeli Acute<br>Paralysis Virus                                                   |                              |                        |          |           |   |
| <b>Ganz &amp; Ebert<br/>(2010)</b>   | 7 | <i>Daphnia magna</i>                             | <i>Glugoides<br/>intestinalis,<br/>Ordospora colligate,<br/>Microsporidium sp.<br/>(undescribed<br/>species)</i> | Fungus,<br>Fungus,<br>Fungus | Parasite<br>prevalence | Figure 2 | Mean ± SE | 3 |
| <b>Hale &amp;<br/>Briskie (2007)</b> | 8 | New Zealand Robin<br><i>(Petroica australis)</i> | Hippoboscid flies<br><i>(Ornithomya spp.<br/>and Prnithoica spp.),</i><br>Feather mite                           | Fly,<br>Mite                 | Parasite load          | Figure 1 | Mean ± SD | 2 |

|                                         |    |                                             |                                                                                        |                                  |                                          |                       |           |   |
|-----------------------------------------|----|---------------------------------------------|----------------------------------------------------------------------------------------|----------------------------------|------------------------------------------|-----------------------|-----------|---|
| <b>Hughes &amp; Boomsma (2004)</b>      | 9  | Ant ( <i>Acromyrmex echinator</i> )         | <i>Metarhizium anisopliae</i> (strain KVL 02-73)                                       | Fungus                           | Host mortality                           | Figure 4              | Mean ± SE | 2 |
| <b>Liersch and Schmid-Hempel (1998)</b> | 10 | Bumblebee ( <i>Bombus terrestris</i> )      | <i>Crithidia bombi</i> ,<br><i>Nosema bombi</i> ,<br><i>Apicystis (Mattesia) bombi</i> | Protozoa,<br>Fungus,<br>Protozoa | Parasite<br>prevalence,<br>Parasite load | Figure 1              | Mean + CI | 2 |
| <b>Manlik et al. (2017)</b>             | 11 | Bumblebee ( <i>Bombus terrestris</i> )      | <i>Nosema bombi</i>                                                                    | Fungus                           | Parasite<br>prevalence                   | In text               | Mean ± SE | 1 |
| <b>Pearman &amp; Garner (2005)</b>      | 12 | Italian agile frog ( <i>Rana latastei</i> ) | <i>Ranavirus</i> (frog virus 3)                                                        | Virus                            | Host mortality                           | Figure 2,<br>Raw data | Mean ± SD | 3 |
| <b>Reber et al. (2008)</b>              | 13 | Ant ( <i>Formica selysi</i> )               | <i>Metarhizium anisopliae</i>                                                          | Fungus                           | Host mortality                           | Figure 1,<br>2        | Mean ± SE | 3 |

|                                         |    |                                        |                                                    |          |                     |                    |           |   |
|-----------------------------------------|----|----------------------------------------|----------------------------------------------------|----------|---------------------|--------------------|-----------|---|
| <b>Schmidt <i>et al.</i> (2011)</b>     | 14 | Ant ( <i>Monomorium pharaonis</i> )    | <i>Beauveria bassiana</i>                          | Fungus   | Host mortality      | Figure 3           | Mean + CI | 3 |
| <b>Seeley and Tarpy (2007)</b>          | 15 | Honeybee ( <i>Apis mellifera</i> L.)   | American foulbrood ( <i>Paenibacillus larvae</i> ) | Bacteria | Parasite prevalence | Figure 2, Raw data | Mean ± SD | 2 |
| <b>Shykoff and Schmid-Hempel (1991)</b> | 16 | Bumblebee ( <i>Bombus terrestris</i> ) | <i>Crithidia bombi</i>                             | Protozoa | Parasite prevalence | Figure 2           | t - value | 2 |
| <b>Smallbone <i>et al.</i> (2016)</b>   | 17 | Guppy ( <i>Poecilia reticulata</i> )   | <i>Gyrodactylus turnbulii</i> (strain Gt3)         | Worm     | Parasite load       | Figure 2           | Mean ± SE | 1 |

|                                |    |                                      |                                                                                                                                                                                               |                                            |                     |                       |           |   |
|--------------------------------|----|--------------------------------------|-----------------------------------------------------------------------------------------------------------------------------------------------------------------------------------------------|--------------------------------------------|---------------------|-----------------------|-----------|---|
| <b>Tarpy (2003)</b>            | 18 | Honeybee ( <i>Apis mellifera</i> L.) | Chalkbrood disease ( <i>Acosphaera apis</i> )                                                                                                                                                 | Fungus                                     | Parasite prevalence | Figure 2              | Mean ± SD | 1 |
| <b>Tarpy and Seeley (2006)</b> | 19 | Honeybee ( <i>Apis mellifera</i> L.) | Sacbrood (Iflavirus genus),<br>Chalkbrood disease ( <i>Acosphaera apis</i> ),<br>European foulbrood ( <i>Melissococcus plutonius</i> ),<br>American foulbrood ( <i>Paenibacillus larvae</i> ) | Virus,<br>Fungus,<br>Bacteria,<br>Bacteria | Parasite prevalence | In text               | t - value | 4 |
| <b>van Houte et al. (2016)</b> | 20 | <i>Pseudomonas aeruginosa</i> ,      | Bacteriophage (DMS3),                                                                                                                                                                         | Virus,<br>Virus                            | Parasite prevalence | Figure 2,<br>Raw data | Mean ± SD | 5 |

|                               |    |                                               |                                                                                                                               |                 |                     |                    |           |   |
|-------------------------------|----|-----------------------------------------------|-------------------------------------------------------------------------------------------------------------------------------|-----------------|---------------------|--------------------|-----------|---|
|                               |    | <i>Streptococcus thermophilus</i>             | Bacteriophage (2972)                                                                                                          |                 |                     |                    |           |   |
| <b>Wargo et al. (2012)</b>    | 21 | Rainbow trout ( <i>Oncorhynchus mykiss</i> )  | Infectious hematopoietic necrosis virus (IHNV) isolates:<br>220:90 (HV),<br>WRAC 039-82 (LV),<br>FF020-91 (B),<br>FF030-91(C) | Virus           | Parasite prevalence | Figure 2, Raw data | Mean ± SE | 4 |
| <b>Whiteman et al. (2006)</b> | 22 | Galapagos Hawk ( <i>Buteo galapagoensis</i> ) | <i>Colpocephalum turbinatum</i> ,<br><i>Degeerialla regalis</i>                                                               | Louse,<br>Louse | Parasite load       | Figure 2, Raw data | Mean ± SD | 2 |
